# Supplementary material for: Higher insoluble fiber intake is associated with a lower risk of prostate cancer: results from the PLCO cohort
Source: Springer Nature journal article supplement (doi:10.1186/s12889-024-17768-8), 2024-01-19
Supplement: MOESM4 [file 26643442]

This document certifies that the manuscript

## Higher insoluble fiber intake is associated with lower risk of prostate cancer: results from the PLCO cohort

prepared by the authors

**Shen Yang**

was edited for proper English language, grammar, punctuation, spelling, and overall style by one or more of the highly qualified native English speaking editors at AJE.

This certificate was issued on **December 30, 2023** and may be verified on the [AJE website](#) using the verification code **F73D-758E-453C-CD96-4BCP**.

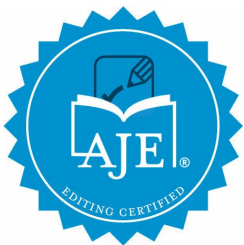

Neither the research content nor the authors' intentions were altered in any way during the editing process. Documents receiving this certification should be English-ready for publication; however, the author has the ability to accept or reject our suggestions and changes. To verify the final AJE edited version, please visit our verification page at [aje.com/certificate](#). If you have any questions or concerns about this edited document, please contact AJE at [support@aje.com](mailto:support@aje.com).
